# Supplementary material for: Safety Evaluation of Oral Sirolimus in the Treatment of Childhood Diseases: A Systematic Review
Source: MDPI journal article supplement (doi:10.3390/children9091295), 2022-08-26
Supplement: s1 [file s1]

**Supplementary Table S3 List of incidence rates of adverse events after targeted blood concentration subgroups analysis**

| Adverse events <sup>a</sup>       | Targeted blood drug concentration (Incidence rate) |                             | P-value |
|-----------------------------------|----------------------------------------------------|-----------------------------|---------|
|                                   | <10ng/ml                                           | ≥10ng/ml                    |         |
|                                   | Incidence rate <sup>b</sup>                        | Incidence rate <sup>b</sup> |         |
| Gastrointestinal reaction         | 1.9% (95%CI: 0.000-0.055)                          | 30.2% (95%CI: 0.221-0.382)  | <0.01   |
| ♦ Nausea and vomiting             | 0.1% (95%CI: 0.000-0.007)                          | 6.0% (95%CI: 0.000-0.159)   | <0.01   |
| ♦ Diarrhea                        | 0.0% (95%CI: 0.000-0.007)                          | 8.7% (95%CI: 0.038-0.137)   | <0.01   |
| Oral mucositis                    | 8.1% (95%CI: 0.052-0.109)                          | 37.3% (95%CI: 0.289-0.457)  | <0.01   |
| Acne                              | 14.1% (95%CI: 0.000-0.421)                         | 6.3% (95%CI: 0.021-0.106)   | 0.59    |
| Upper respiratory tract infection | 18.9% (95%CI: 0.000-0.379)                         | 26.2% (95%CI: 0.185-0.339)  | <0.01   |
| Pneumonia                         | 0.0% (95%CI: 0.000-0.006)                          | 16.7% (95%CI: 0.102-0.232)  | <0.01   |
| Anorexia                          | 1.7% (95%CI: 0.000-0.048)                          | 0.0% (95%CI: 0.000-0.011)   | 0.31    |
| Edema                             | 0.0% (95%CI: 0.000-0.006)                          | 1.6% (95%CI: 0.000-0.038)   | 0.17    |
| Alopecia                          | 0.0% (95%CI: 0.000-0.006)                          | 3.2% (95%CI: 0.001-0.062)   | 0.05    |
| Eczema                            | 0.0% (95%CI: 0.000-0.006)                          | 11.1% (95%CI: 0.056-0.166)  | <0.01   |
| Dyslipidemia                      | 3.9% (95%CI: 0.013-0.065)                          | 6.3% (95%CI: 0.021-0.106)   | 0.34    |
| ♦ Hypercholesterolemia            | 3.7% (95%CI: 0.000-0.090)                          | 0.0% (95%CI: 0.000-0.011)   | 0.19    |
| ♦ Hyperlipidemia                  | 0.1% (95%CI: 0.000-0.007)                          | 6.3% (95%CI: 0.021-0.106)   | 0.07    |
| Anemia                            | 0.1% (95%CI: 0.000-0.007)                          | 1.6% (95%CI: 0.000-0.038)   | 0.20    |
| Neutropenia                       | 0.1% (95%CI: 0.000-0.007)                          | 8.7% (95%CI: 0.038-0.137)   | <0.01   |
| Increases in liver enzymes        | 6.1% (95%CI: 0.030-0.092)                          | 19.8% (95%CI: 0.129-0.268)  | <0.01   |
| serious adverse events            | 1.5% (95%CI: 0.000-0.049)                          | 9.3% (95%CI: 0.060-0.127)   | <0.01   |

<sup>a</sup> Each subgroup ≥1 articles reported the adverse event.

<sup>b</sup> If  $I^2 > 50\%$ , we used random effects. If  $I^2 \leq 50\%$ , we chose fixed effects.
