# Supplementary material for: Safety Evaluation of Oral Sirolimus in the Treatment of Childhood Diseases: A Systematic Review
Source: MDPI journal article supplement (doi:10.3390/children9091295), 2022-08-26
Supplement: s1 [file s1]

**Supplementary Table S4 List of incidence rates of adverse events after disease subgroups analysis**

| Adverse events <sup>a</sup>       | Diseases (Incidence rate)   |                             |         |
|-----------------------------------|-----------------------------|-----------------------------|---------|
|                                   | Vascular anomalies          | Tuberous sclerosis complex  | P-value |
|                                   | Incidence rate <sup>b</sup> | Incidence rate <sup>b</sup> |         |
| Gastrointestinal reaction         | 1.9% (95%CI: 0.000-0.079)   | 24.8% (95%CI: 0.00-0.631)   | 0.25    |
| ♦ Nausea and vomiting             | 10.8% (95%CI: 0.000-0.318)  | 1.1% (95%CI: 0.000-0.041)   | 0.37    |
| Oral mucositis                    | 33.9% (95%CI: 0.207-0.472)  | 7.8% (95%CI: 0.049-0.107)   | <0.01   |
| Acne                              | 2.6% (95%CI: 0.000-0.073)   | 17.9% (95%CI: 0.000-0.533)  | 0.40    |
| Upper respiratory tract infection | 24.1% (95%CI: 0.117-0.365)  | 24.3% (95%CI: 0.000-0.650)  | 0.99    |
| Pneumonia                         | 9.2% (95%CI: 0.000-0.209)   | 0.0% (95%CI: 0.000-0.007)   | 0.12    |
| Anorexia                          | 0.0% (95%CI: 0.000-0.011)   | 2.1% (95%CI: 0.000-0.057)   | 0.28    |
| Edema                             | 1.2% (95%CI: 0.000-0.033)   | 0.0% (95%CI: 0.000-0.006)   | 0.29    |
| Alopecia                          | 2.0% (95%CI: 0.000-0.046)   | 0.0% (95%CI: 0.000-0.006)   | 0.14    |
| Eczema                            | 3.9% (95%CI: 0.000-0.114)   | 0.0% (95%CI: 0.000-0.007)   | 0.31    |
| Fatigue                           | 0.0% (95%CI: 0.000-0.011)   | 0.0% (95%CI: 0.000-0.007)   | 0.99    |
| Pain                              | 9.8% (95%CI: 0.000-0.221)   | 0.0% (95%CI: 0.000-0.006)   | 0.12    |
| ♦ Headache                        | 6.0% (95%CI: 0.000-0.183)   | 0.0% (95%CI: 0.000-0.006)   | 0.34    |
| Dyslipidemia                      | 5.0% (95%CI: 0.025-0.075)   | 4.3% (95%CI: 0.016-0.069)   | 0.69    |
| ♦ Hypercholesterolemia            | 2.0% (95%CI: 0.000-0.056)   | 5.0% (95%CI: 0.000-0.121)   | 0.46    |
| ♦ Hyperlipidemia                  | 3.7% (95%CI: 0.000-0.088)   | 4.2% (95%CI: 0.021-0.064)   | 0.85    |
| Anemia                            | 1.2% (95%CI: 0.000-0.033)   | 0.1% (95%CI: 0.000-0.007)   | 0.31    |
| Neutropenia                       | 3.3% (95%CI: 0.000-0.093)   | 0.1% (95%CI: 0.000-0.007)   | 0.49    |
| Increases in liver enzymes        | 10.5% (95%CI: 0.000-0.213)  | 6.8% (95%CI: 0.036-0.100)   | 0.52    |
| serious adverse events            | 7.7 (95%CI: 0.000-0.187)    | 1.5% (95%CI: 0.000-0.049)   | 0.29    |

<sup>a</sup> Each subgroup  $\geq 1$  articles reported the adverse event.

<sup>b</sup> If  $I^2 > 50\%$ , we used random effects. If  $I^2 \leq 50\%$ , we chose fixed effects.
