# Supplementary material for: Safety Evaluation of Oral Sirolimus in the Treatment of Childhood Diseases: A Systematic Review
Source: MDPI journal article supplement (doi:10.3390/children9091295), 2022-08-26
Supplement: s1 [file s1]

### A list of studies removed after reading the main text

| Reason                                       | n  |
|----------------------------------------------|----|
| Age $\geq$ 18 or identified as a adult study | 15 |
| Topical therapy                              | 7  |
| Retrospective study                          | 9  |
| Case report                                  | 6  |
| Drug eluting stent therapy                   | 2  |
| Not clear data                               | 3  |
| Animal therapy                               | 2  |
| Mainly for clearance rate                    | 2  |
| Not in English                               | 2  |
| Total                                        | 48 |

### A list of studies removed after conforming to the inclusion criteria and exclusion criteria

| Title                                                                                                                                                                | Author            | Reason                                                                            |
|----------------------------------------------------------------------------------------------------------------------------------------------------------------------|-------------------|-----------------------------------------------------------------------------------|
| Histological progression of chronic renal allograft injury comparing sirolimus and mycophenolate mofetil-based protocols                                             | Blydt-Hansen T.D. | Only present a table of the number of times rather than the number of cases       |
| Sirolimus for progressive neurofibromatosis type 1-associated plexiform neurofibromas: a neurofibromatosis Clinical Trials Consortium phase II study                 | Brian Weiss, B.C. | Only show the adverse events data of the experimental and placebo groups together |
| Safety and pharmacokinetics of ascending single doses of sirolimus (Rapamune, rapamycin) in pediatric patients with stable chronic renal failure undergoing dialysis | Tejani A.         | Mainly discuss patient tolerance to four sirolimus doses                          |
