# Supplementary material for: Safety Evaluation of Oral Sirolimus in the Treatment of Childhood Diseases: A Systematic Review
Source: Children (Basel). 2022 Aug 26;9(9):1295. doi: 10.3390/children9091295 (PMC9497617; doi:10.3390/children9091295)
Supplement: Supplementary file 1 [file children-09-01295-s001.zip]

Archive with 6 entries (6 files):
- Supplementary Table 1 A list of studies removed after reading the main text.pdf
- Supplementary Table 2 Description of the incidence of AEs after removing highly heterogeneous data.pdf
- Supplementary Table 3 List of incidence rates of adverse events after targeted blood concentration subgroups analysis.pdf
- Supplementary Table 4 List of incidence rates of adverse events after disease subgroups analysis.pdf
- Supplementary Table 5 PRISMA_2020_checklist.pdf
- Supplementary Table 6 PRISMA_2020_flow_diagram.pdf
